# Supplementary material for: Large-scale particulate air pollution and chemical fingerprint of volcanic sulfate aerosols from the 2014–2015 Holuhraun flood lava eruption of Bárðarbunga volcano (Iceland)
Source: Copernicus journal article supplement (doi:10.5194/acp-19-14253-2019), 2019-11-27

SO<sub>2</sub> mass conc.

( $\mu\text{g S m}^{-3}$ )

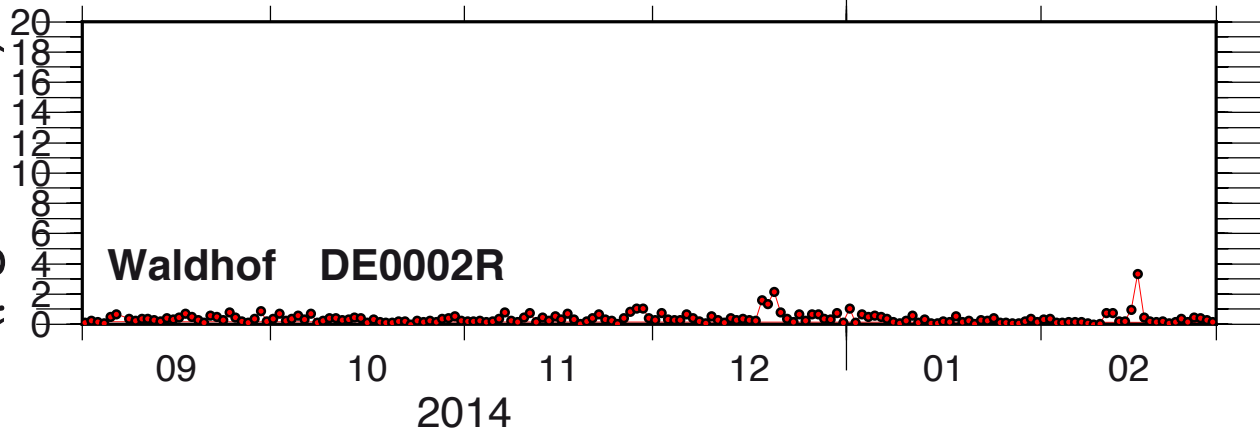

EMEP

SO<sub>4</sub>-- (corr) mass conc  
( $\mu\text{g S m}^{-3}$ )

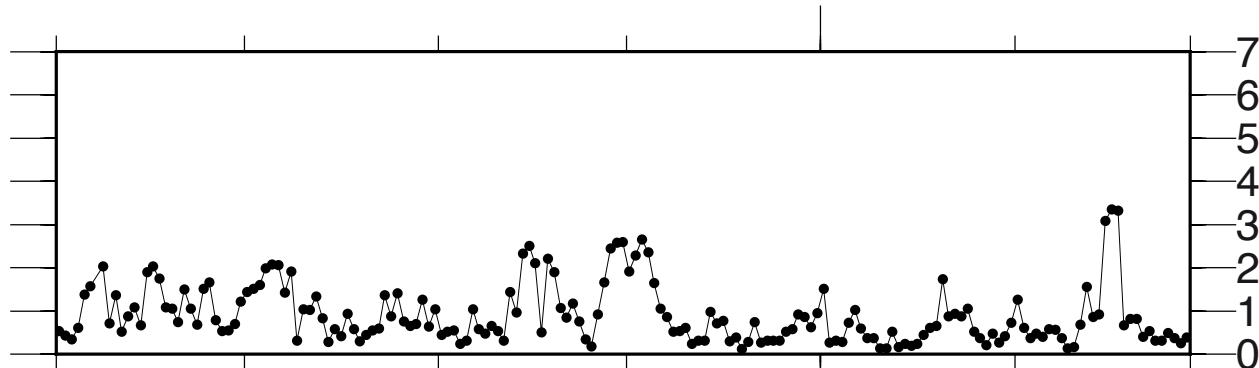

SO<sub>2</sub> mass conc.

EMEP

( $\mu\text{g S m}^{-3}$ )

SO<sub>4</sub><sup>2-</sup> (corr) mass conc  
( $\mu\text{g S m}^{-3}$ )

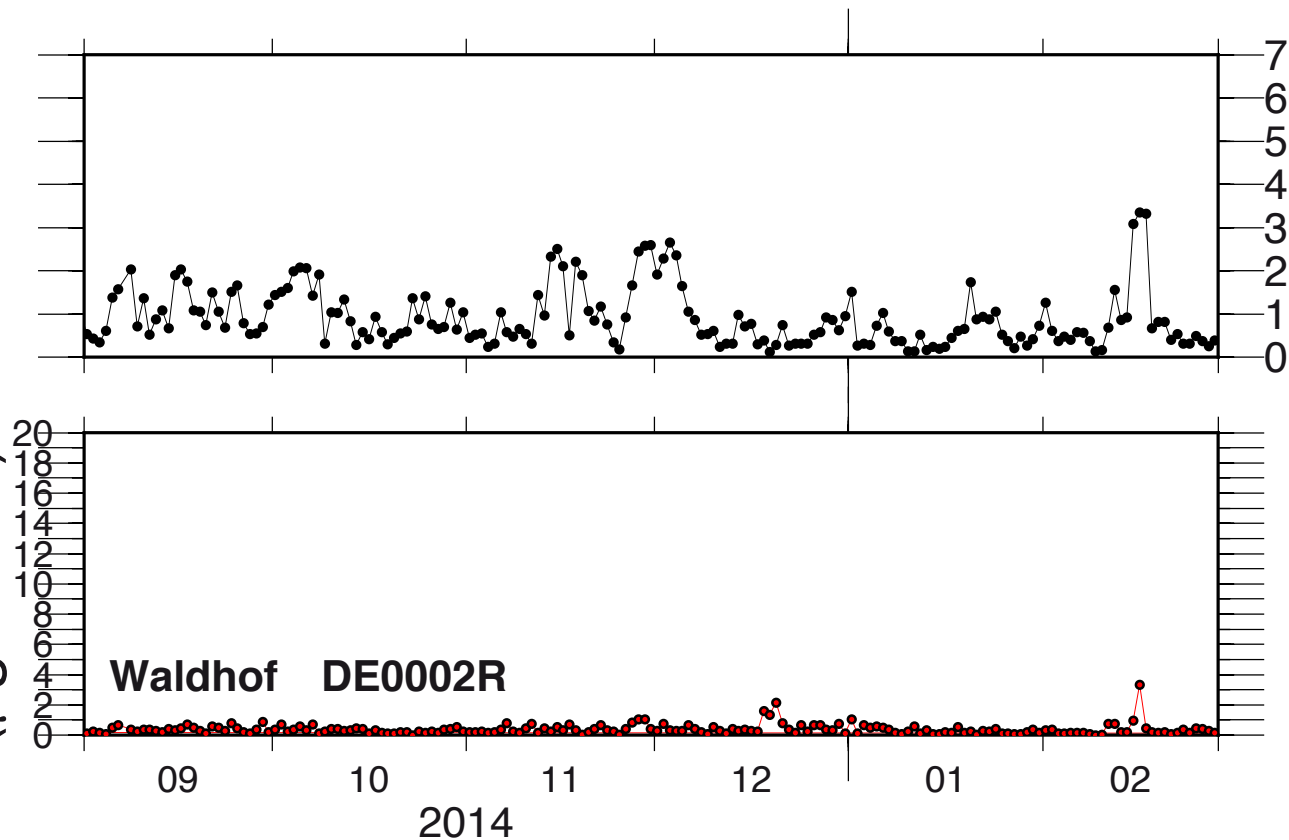

Supplement: Supplementary file 7 [file acp-19-14253-2019-supplement.zip]
