# Supplementary material for: Large-scale particulate air pollution and chemical fingerprint of volcanic sulfate aerosols from the 2014–2015 Holuhraun flood lava eruption of Bárðarbunga volcano (Iceland)
Source: Copernicus journal article supplement (doi:10.5194/acp-19-14253-2019), 2019-11-27
Supplement: Supplementary file 9 [file acp-19-14253-2019-supplement.zip]

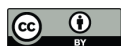

## *Supplement of*

# **Large-scale particulate air pollution and chemical fingerprint of volcanic sulfate aerosols from the 2014–2015 Holuhraun flood lava eruption of Bárðarbunga volcano (Iceland)**

**Marie Boichu et al.**

*Correspondence to:* Marie Boichu (marie.boichu@univ-lille.fr)

- acp-19-14253-2019-supplement-title-page.pdf
- SUBM\_Suppl\_Figures\_and\_2\_animations
  - .DS\_Store
  - Suppl\_figures
    - \* Caption\_Suppl\_figures.txt
    - \* DE0002R\_SO2\_SO4\_corr\_timeseries.pdf
    - \* DE0003R\_SO2\_SO4\_corr\_timeseries.pdf
    - \* DE0007R\_SO2\_SO4\_corr\_timeseries.pdf
    - \* DK0003R\_SO2\_SO4\_corr\_timeseries.pdf
    - \* DK0008R\_SO2\_SO4\_corr\_timeseries.pdf
    - \* DK0012R\_SO2\_SO4\_corr\_timeseries.pdf
    - \* FI0009R\_SO2\_SO4\_corr\_timeseries.pdf
    - \* FI0017R\_SO2\_SO4\_corr\_timeseries.pdf
    - \* FI0036R\_SO2\_SO4\_corr\_timeseries.pdf
    - \* GB0036R\_SO2\_SO4\_corr\_timeseries.pdf
    - \* GB0048R\_SO2\_SO4\_corr\_timeseries.pdf
    - \* IE0001R\_SO2\_SO4\_corr\_timeseries.pdf
    - \* NO0002R\_SO2\_SO4\_corr\_timeseries.pdf
    - \* NO0015R\_SO2\_SO4\_corr\_timeseries.pdf
    - \* NO0039R\_SO2\_SO4\_corr\_timeseries.pdf
    - \* NO0056R\_SO2\_SO4\_corr\_timeseries.pdf
    - \* PL0002R\_SO2\_SO4\_corr\_timeseries.pdf
    - \* PL0003R\_SO2\_SO4\_corr\_timeseries.pdf
    - \* PL0004R\_SO2\_SO4\_corr\_timeseries.pdf
    - \* RU0018R\_SO2\_SO4\_corr\_timeseries.pdf
    - \* SE0005R\_SO2\_SO4\_corr\_timeseries.pdf

- \* SE0011R\_SO2\_SO4\_corr\_timeseries.pdf
- \* SE0012R\_SO2\_SO4\_corr\_timeseries.pdf
- \* SE0014R\_SO2\_SO4\_corr\_timeseries.pdf
- \* SI0008R\_SO2\_SO4\_corr\_timeseries.pdf
- \* SK0002R\_SO2\_SO4\_corr\_timeseries.pdf
- \* SK0006R\_SO2\_SO4\_corr\_timeseries.pdf
- movie\_BAR14\_IASI\_SO2\_20140830\_20141031.mp4
- movie\_BAR14\_OMPS\_SO2\_PBL\_20140830\_20141031.mp4

The copyright of individual parts of the supplement might differ from the CC BY 4.0 License.
