# Supplementary figures and images for: Large-scale particulate air pollution and chemical fingerprint of volcanic sulfate aerosols from the 2014–2015 Holuhraun flood lava eruption of Bárðarbunga volcano (Iceland)
Source: Copernicus journal article supplement (doi:10.5194/acp-19-14253-2019), 2019-11-27

SO<sub>2</sub> mass conc.

( $\mu\text{g S m}^{-3}$ )

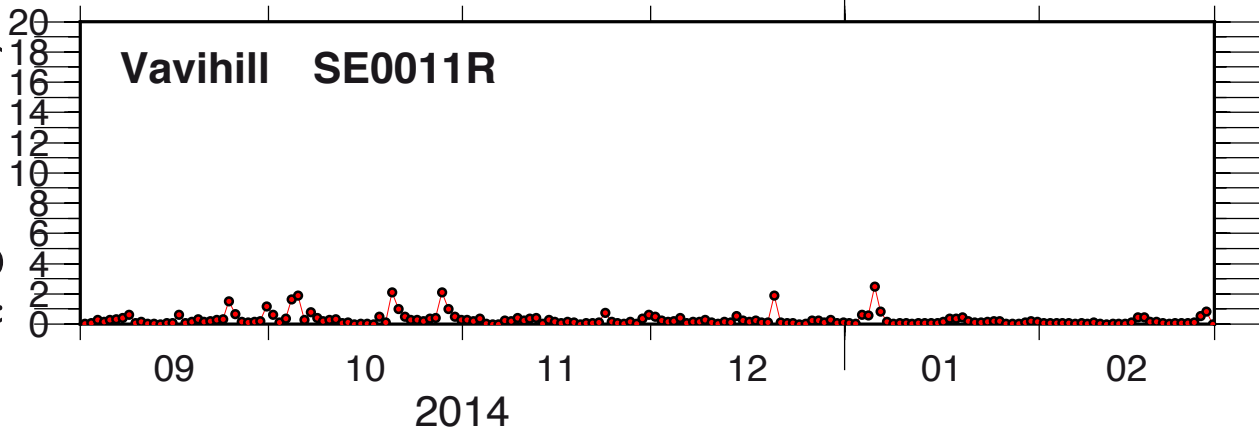

EMEP

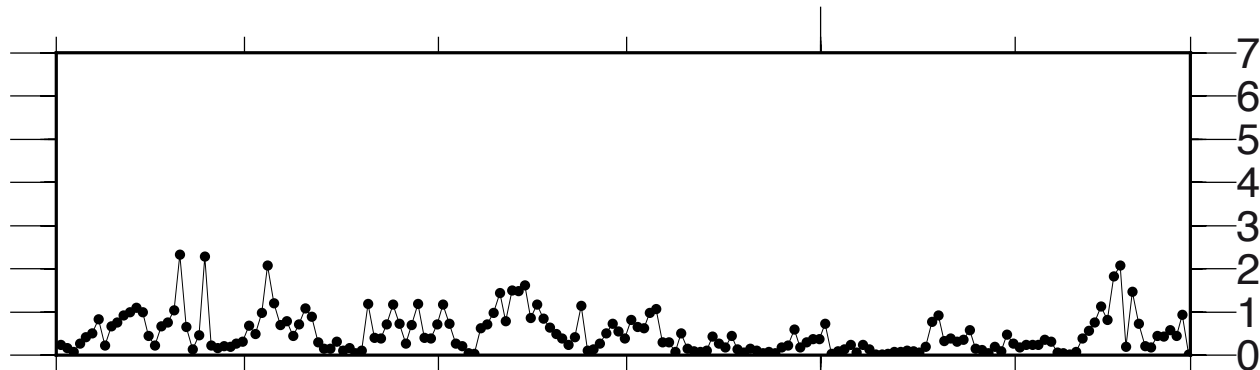

SO<sub>4</sub>— (corr) mass conc  
( $\mu\text{g S m}^{-3}$ )

Supplement: Supplementary file 1 [file acp-19-14253-2019-supplement.zip]

# EMEP

SO<sub>2</sub> mass conc.

( $\mu\text{g S m}^{-3}$ )

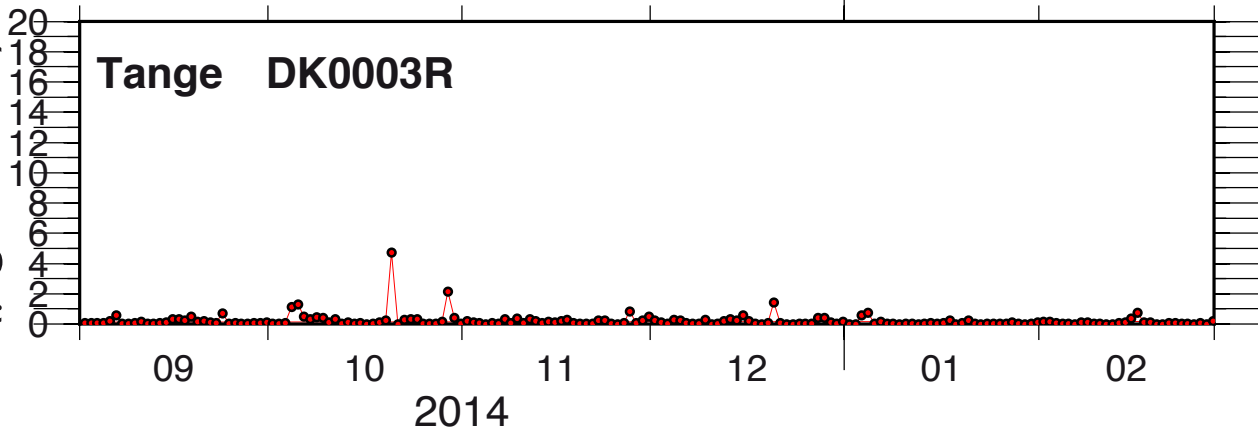

SO<sub>4</sub>-- (corr) mass conc  
( $\mu\text{g S m}^{-3}$ )

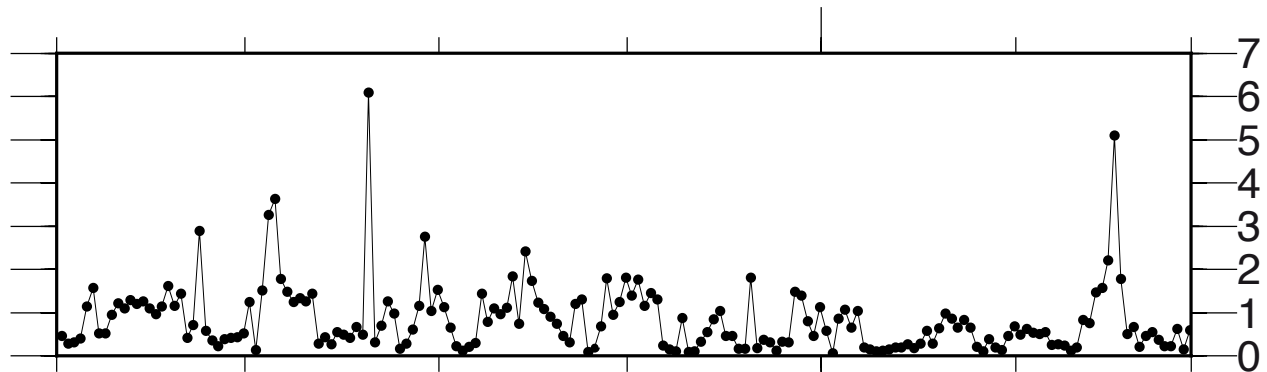

Supplement: Supplementary file 2 [file acp-19-14253-2019-supplement.zip]

SO<sub>2</sub> mass conc.

( $\mu\text{g S m}^{-3}$ )

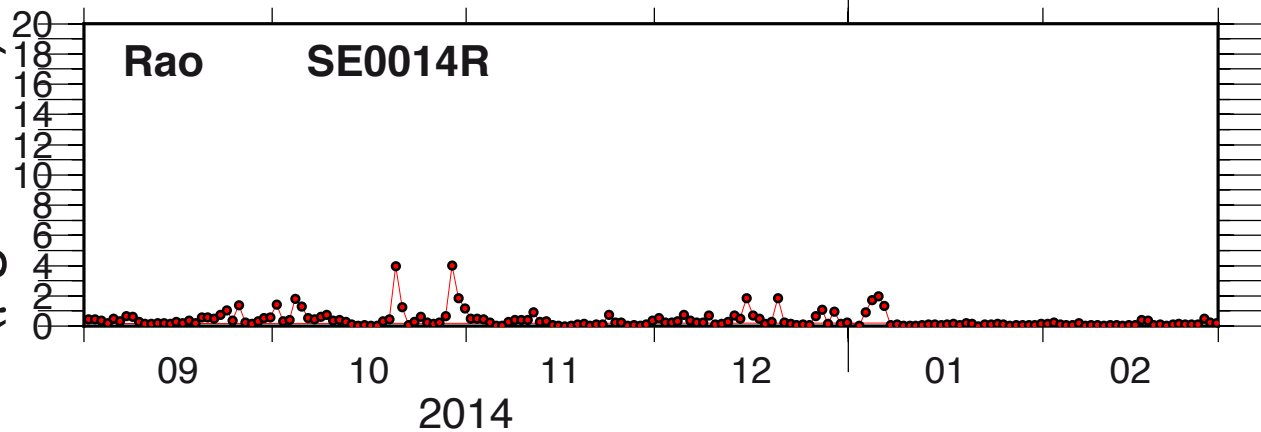

EMEP

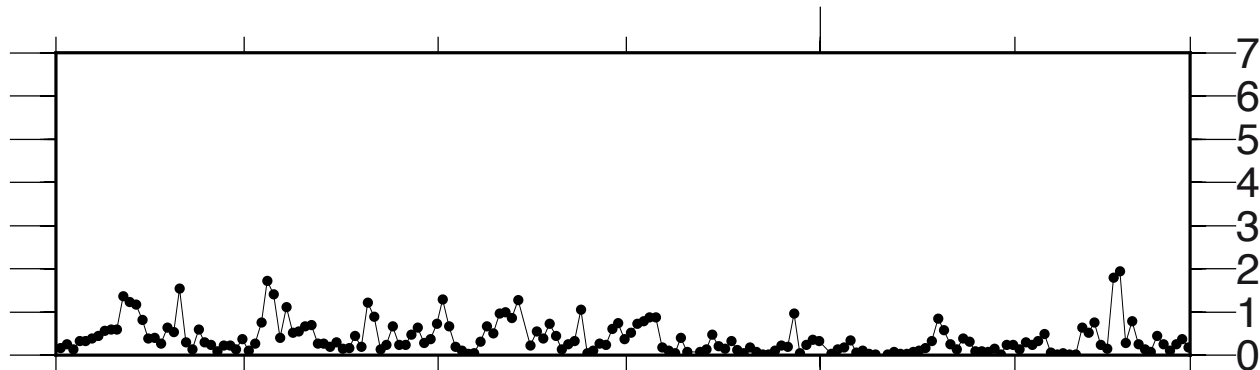

SO<sub>4</sub>-- (corr) mass conc  
( $\mu\text{g S m}^{-3}$ )

Supplement: Supplementary file 3 [file acp-19-14253-2019-supplement.zip]

SO<sub>2</sub> mass conc.

( $\mu\text{g S m}^{-3}$ )

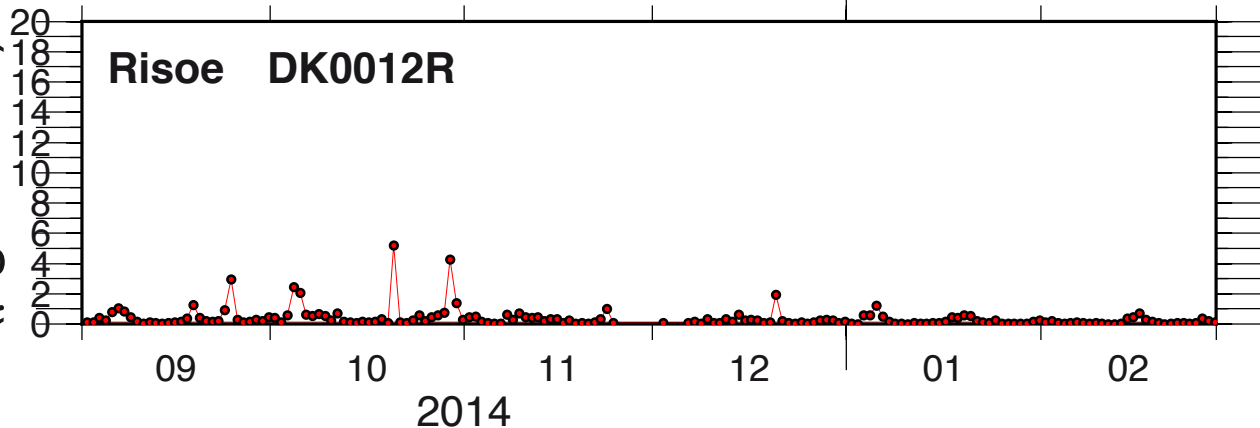

EMEP

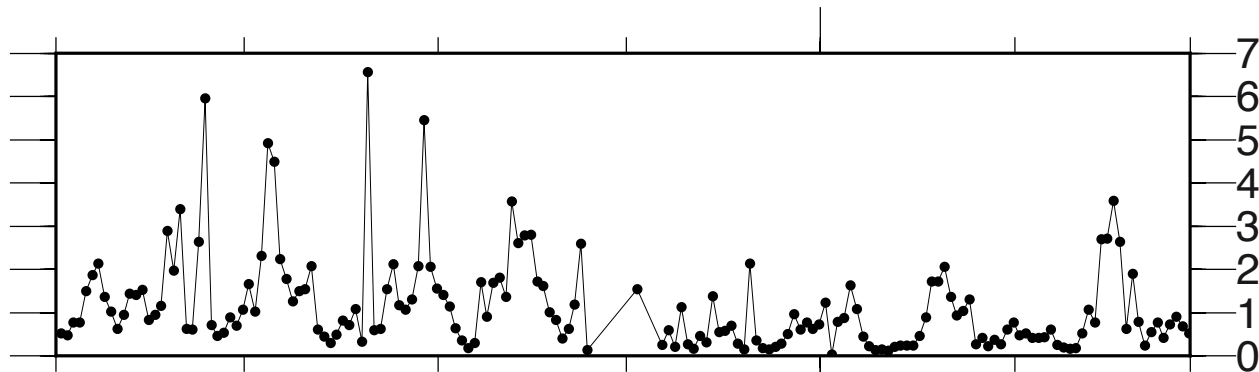

SO<sub>4</sub><sup>2-</sup> (corr) mass conc  
( $\mu\text{g S m}^{-3}$ )

Supplement: Supplementary file 4 [file acp-19-14253-2019-supplement.zip]

SO<sub>2</sub> mass conc.

( $\mu\text{g S m}^{-3}$ )

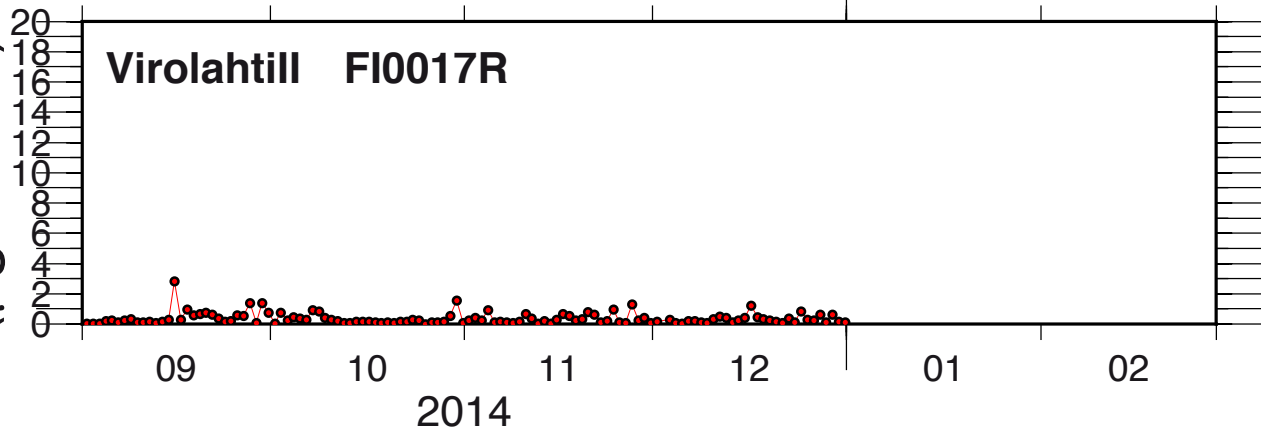

EMEP

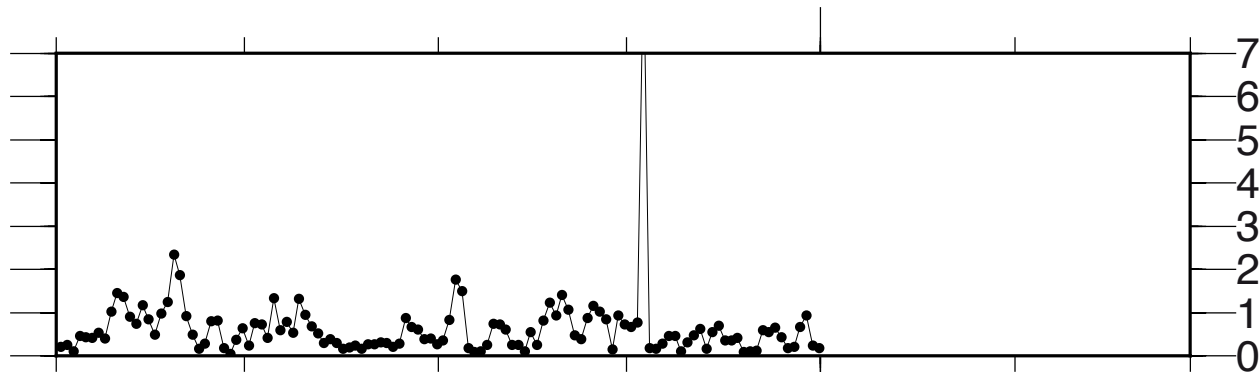

SO<sub>4</sub>-- (corr) mass conc  
( $\mu\text{g S m}^{-3}$ )

Supplement: Supplementary file 5 [file acp-19-14253-2019-supplement.zip]

# EMEP

SO<sub>2</sub> mass conc.

( $\mu\text{g S m}^{-3}$ )

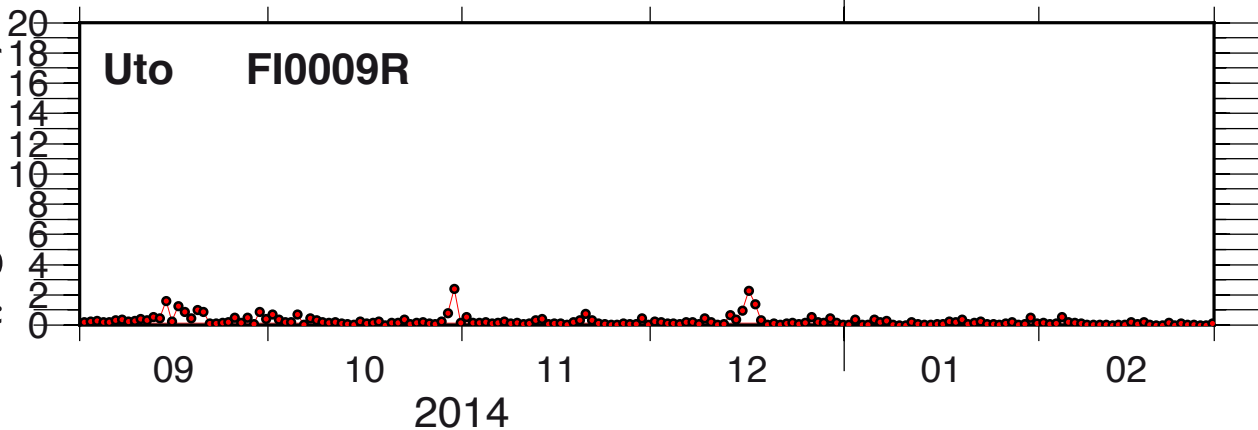

SO<sub>4</sub>-- (corr) mass conc  
( $\mu\text{g S m}^{-3}$ )

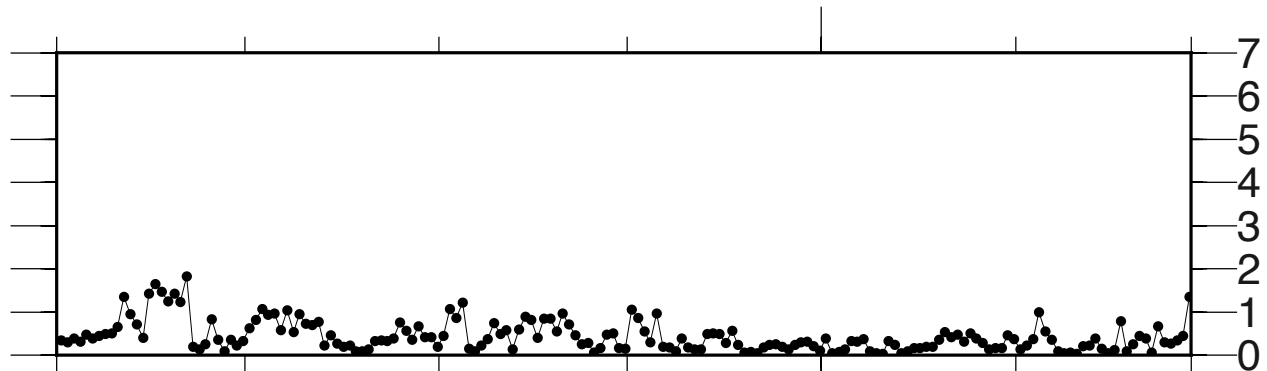

Supplement: Supplementary file 6 [file acp-19-14253-2019-supplement.zip]

SO<sub>2</sub> mass conc.

( $\mu\text{g S m}^{-3}$ )

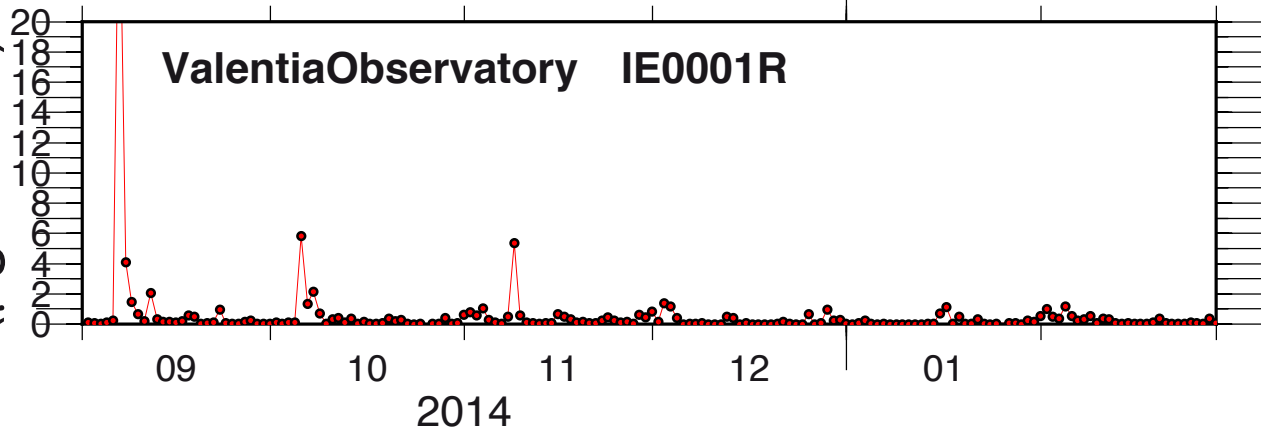

**EMEP**

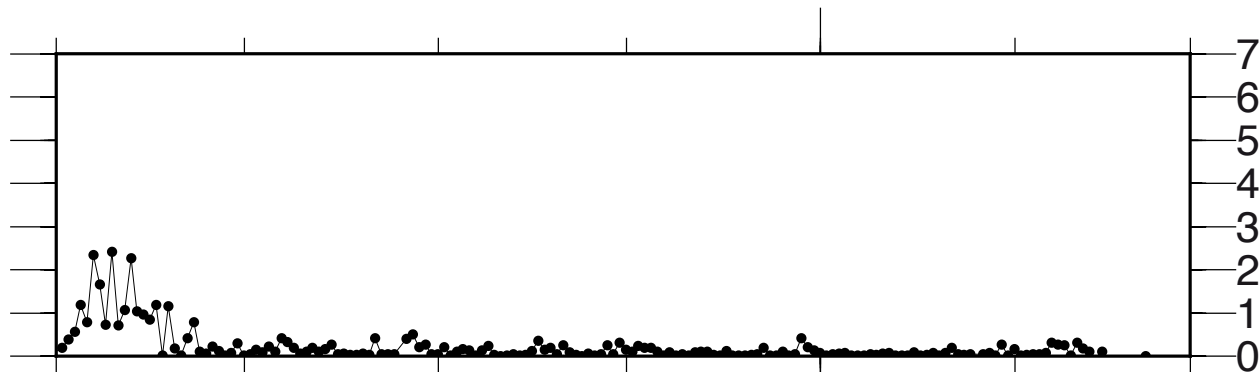

SO<sub>4</sub>— (corr) mass conc  
( $\mu\text{g S m}^{-3}$ )

Supplement: Supplementary file 8 [file acp-19-14253-2019-supplement.zip]

# EMEP

SO<sub>2</sub> mass conc.

( $\mu\text{g S m}^{-3}$ )

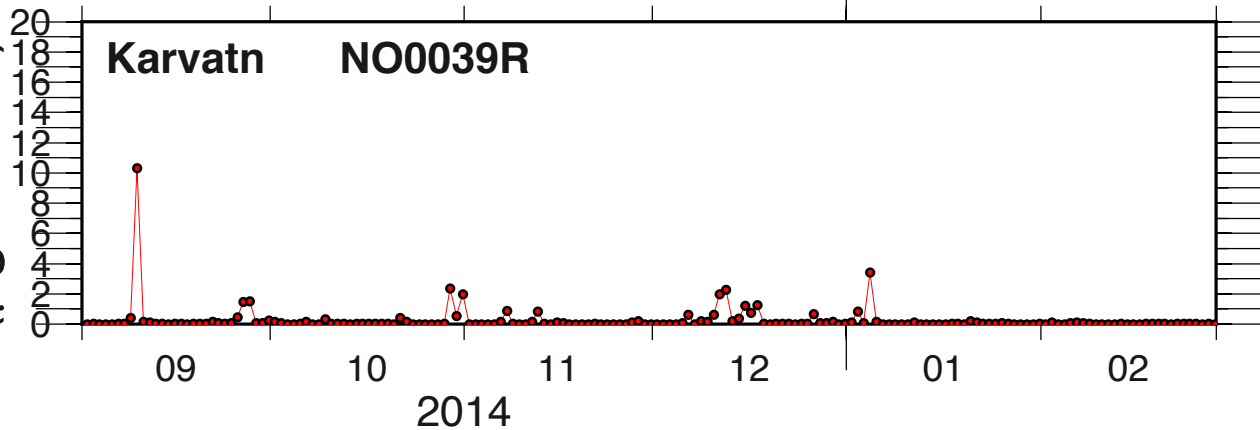

SO<sub>4</sub>-- (corr) mass conc  
( $\mu\text{g S m}^{-3}$ )

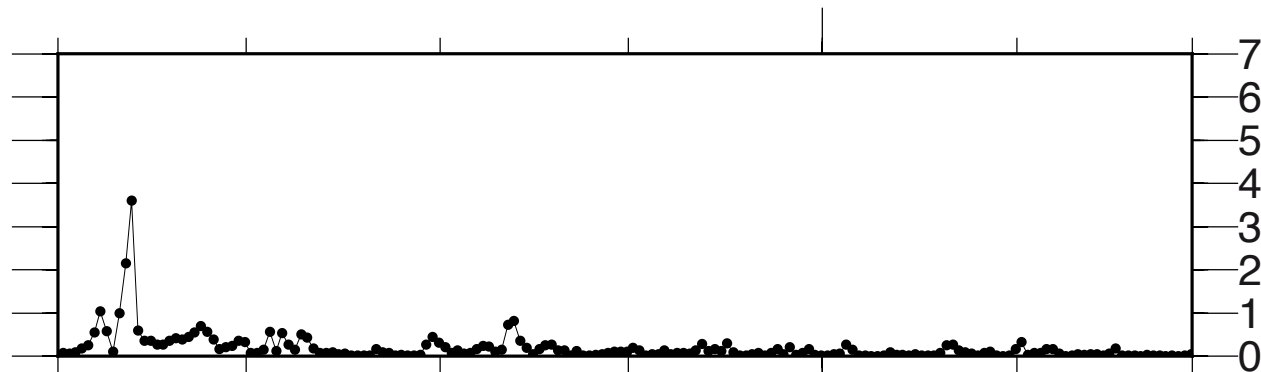

Supplement: Supplementary file 10 [file acp-19-14253-2019-supplement.zip]

SO<sub>2</sub> mass conc.

( $\mu\text{g S m}^{-3}$ )

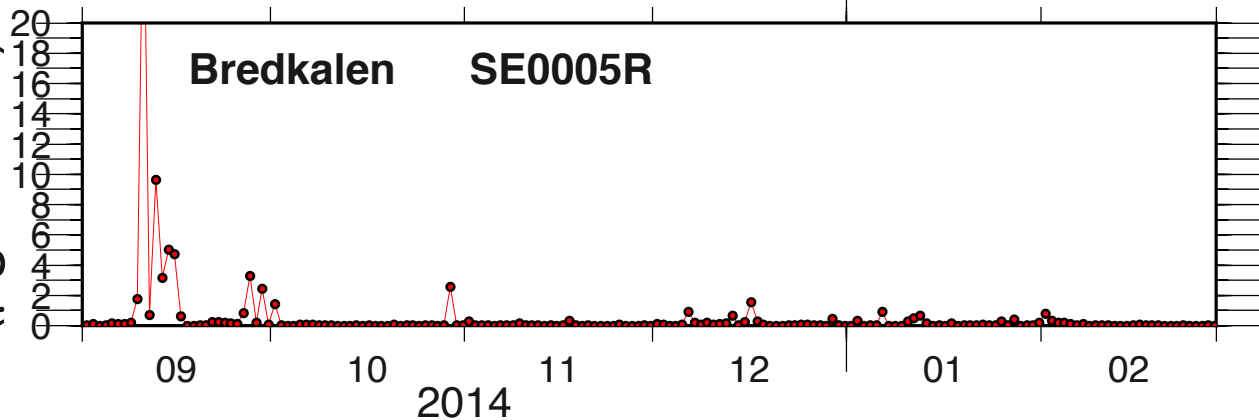

EMEP

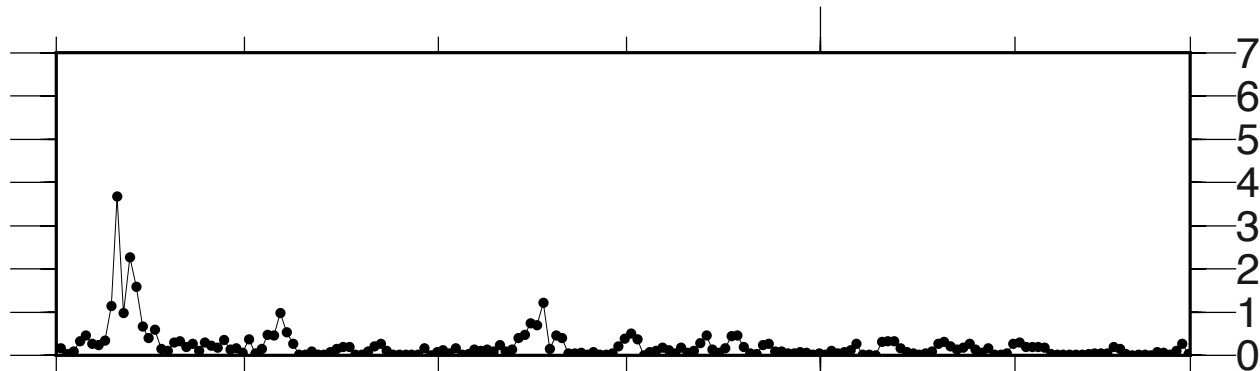

SO<sub>4</sub><sup>2-</sup> (corr) mass conc  
( $\mu\text{g S m}^{-3}$ )

Supplement: Supplementary file 11 [file acp-19-14253-2019-supplement.zip]

SO<sub>2</sub> mass conc.

( $\mu\text{g S m}^{-3}$ )

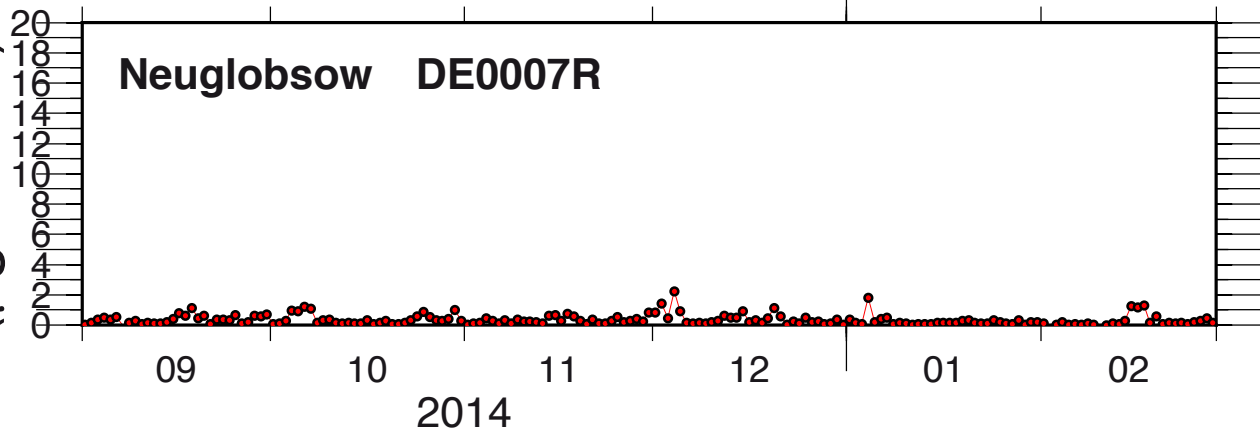

EMEP

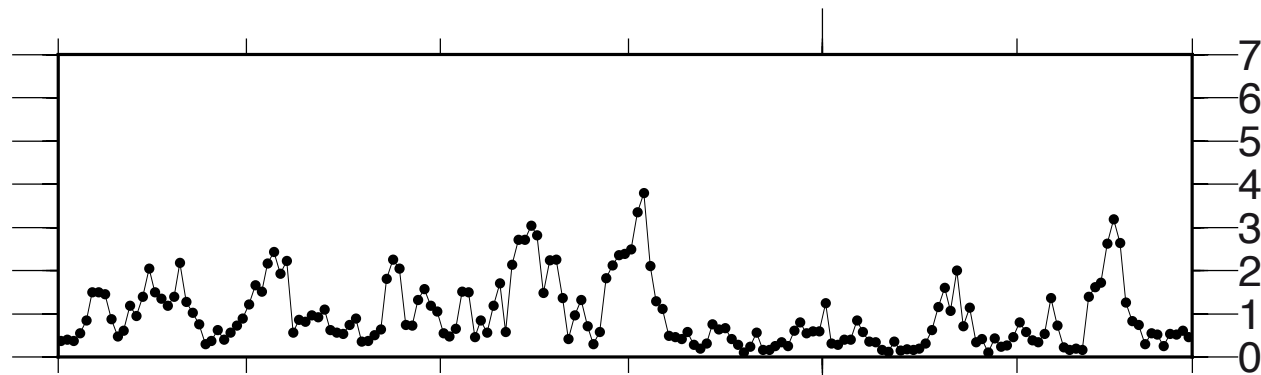

SO<sub>4</sub><sup>2-</sup> (corr) mass conc

( $\mu\text{g S m}^{-3}$ )

Supplement: Supplementary file 12 [file acp-19-14253-2019-supplement.zip]

SO<sub>2</sub> mass conc.

( $\mu\text{g S m}^{-3}$ )

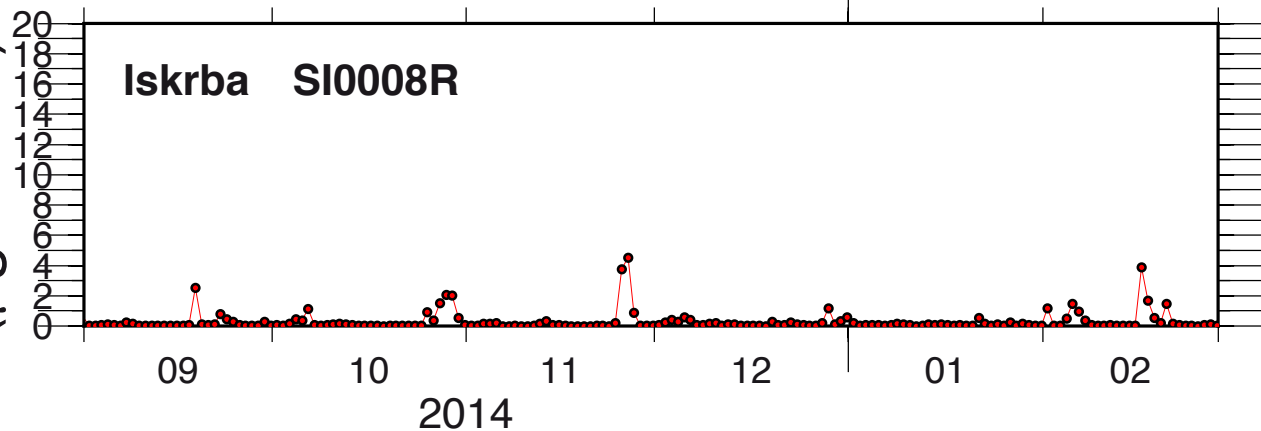

EMEP

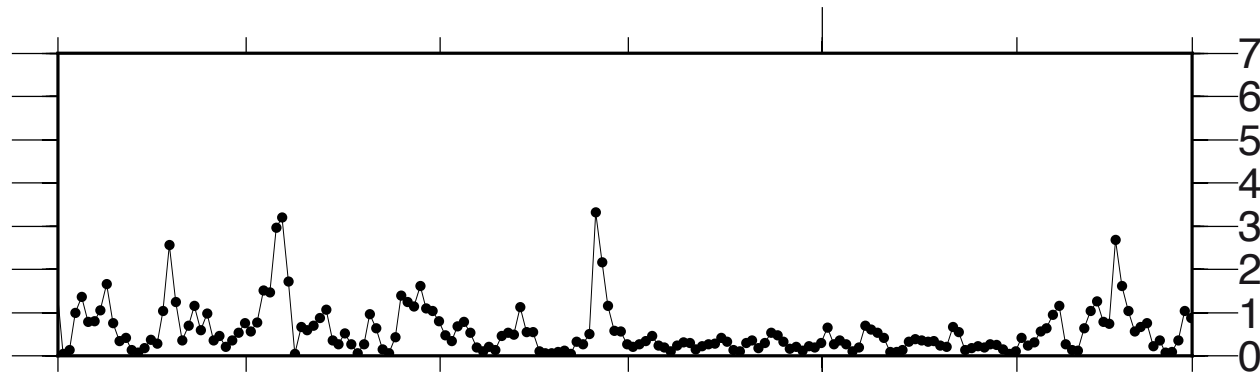

SO<sub>4</sub>-- (corr) mass conc

( $\mu\text{g S m}^{-3}$ )

Supplement: Supplementary file 13 [file acp-19-14253-2019-supplement.zip]

# EMEP

SO<sub>2</sub> mass conc.

( $\mu\text{g S m}^{-3}$ )

20  
18  
16  
14  
12  
10  
8  
6  
4  
2  
0

Tustervatn NO0015R

09

10

11

12

01

02

2014

SO<sub>4</sub>-- (corr) mass conc  
( $\mu\text{g S m}^{-3}$ )

7  
6  
5  
4  
3  
2  
1  
0

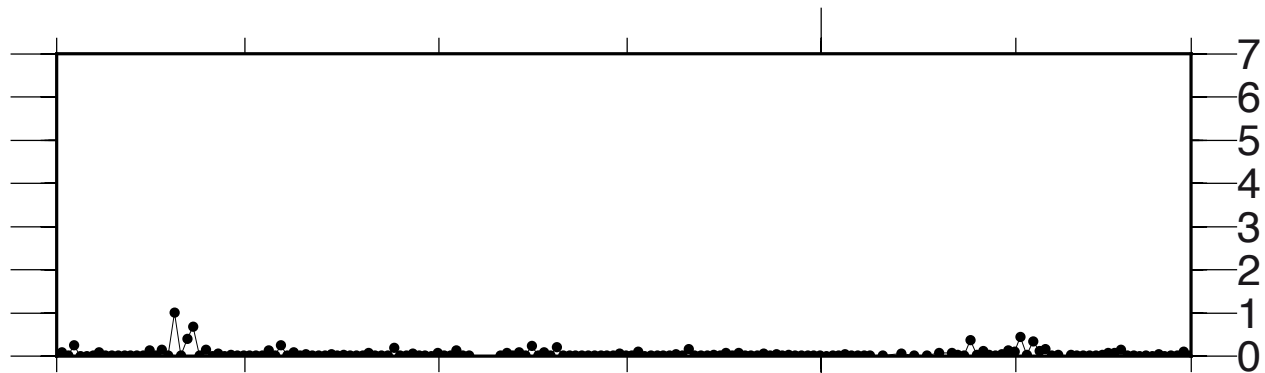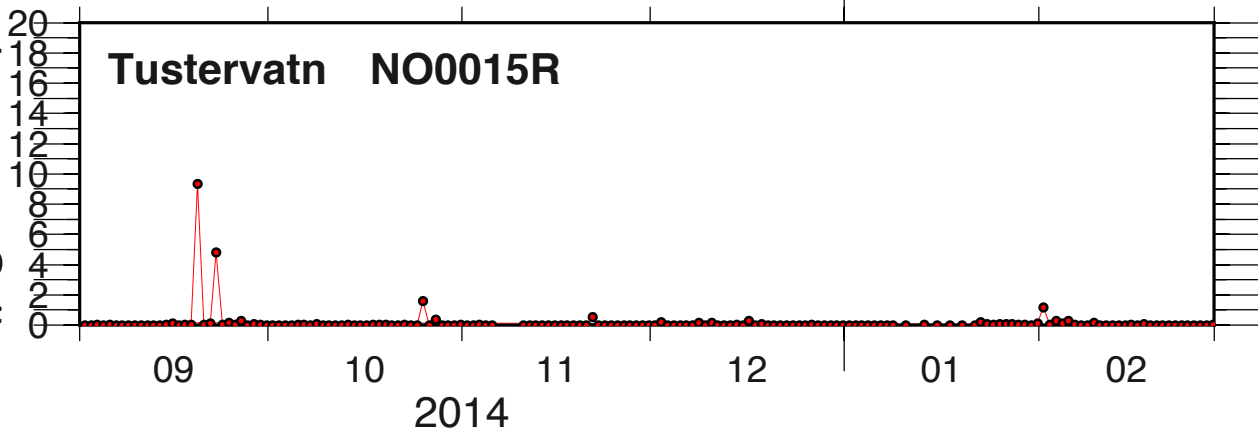

Supplement: Supplementary file 14 [file acp-19-14253-2019-supplement.zip]

SO<sub>2</sub> mass conc.

( $\mu\text{g S m}^{-3}$ )

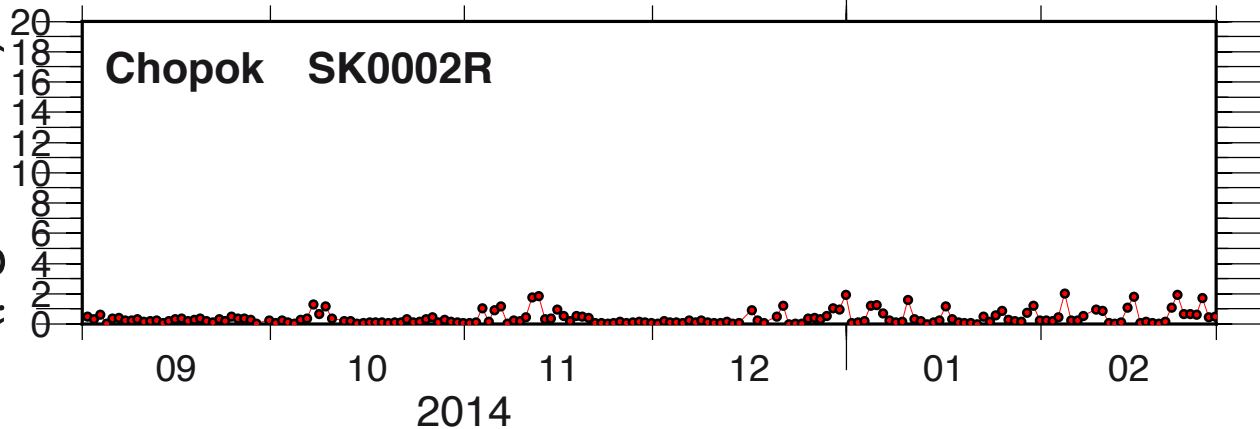

EMEP

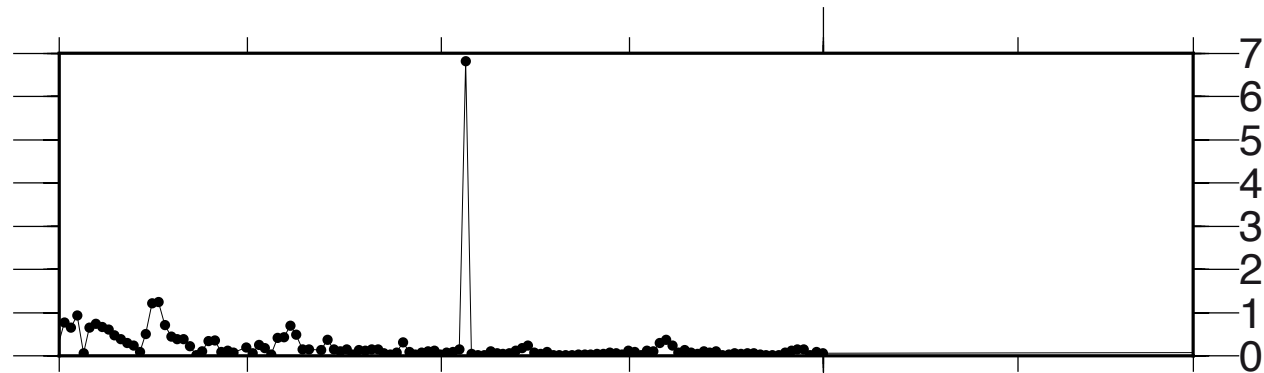

SO<sub>4</sub><sup>2-</sup> (corr) mass conc

( $\mu\text{g S m}^{-3}$ )

Supplement: Supplementary file 15 [file acp-19-14253-2019-supplement.zip]

# EMEP

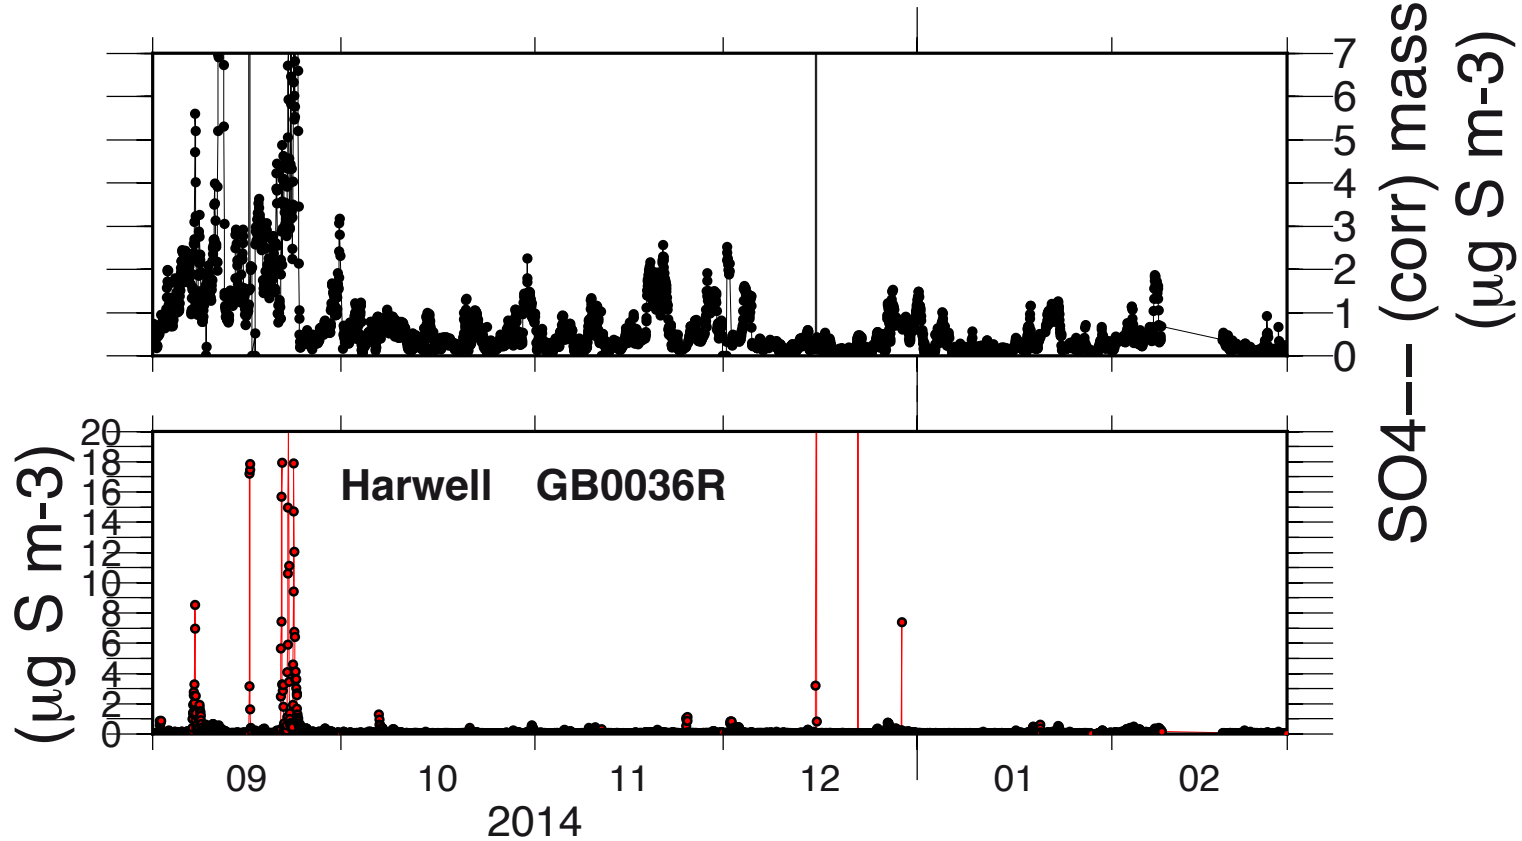

Supplement: Supplementary file 16 [file acp-19-14253-2019-supplement.zip]

# EMEP

SO<sub>2</sub> mass conc.

( $\mu\text{g S m}^{-3}$ )

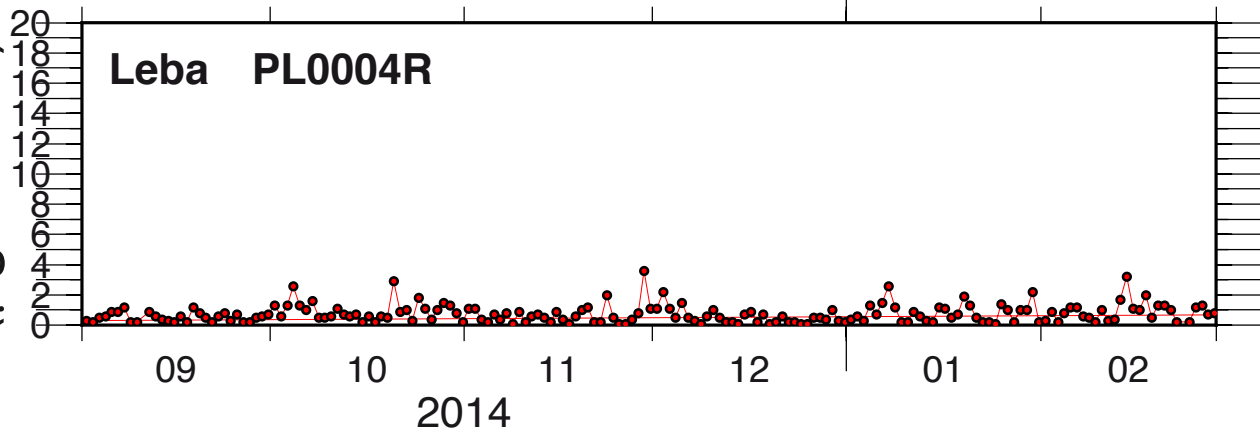

SO<sub>4</sub>-- (corr) mass conc  
( $\mu\text{g S m}^{-3}$ )

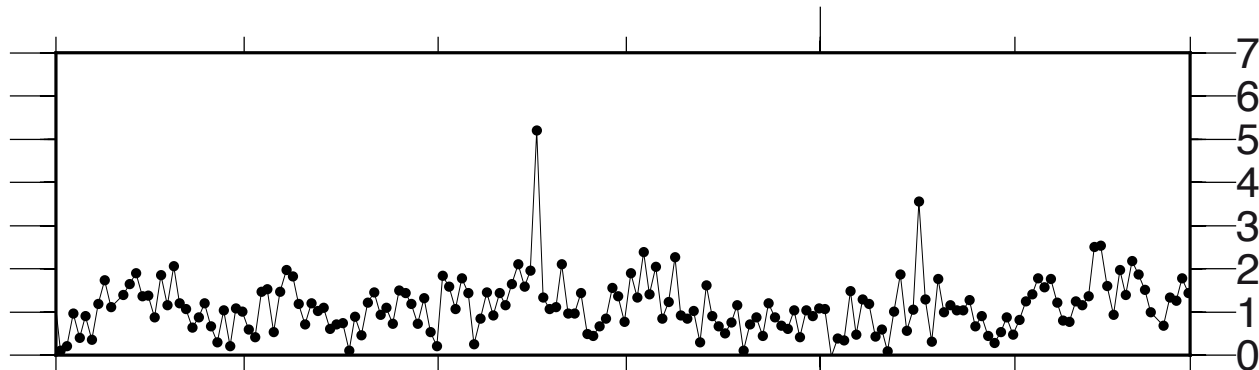

Supplement: Supplementary file 17 [file acp-19-14253-2019-supplement.zip]

# EMEP

SO<sub>2</sub> mass conc.

( $\mu\text{g S m}^{-3}$ )

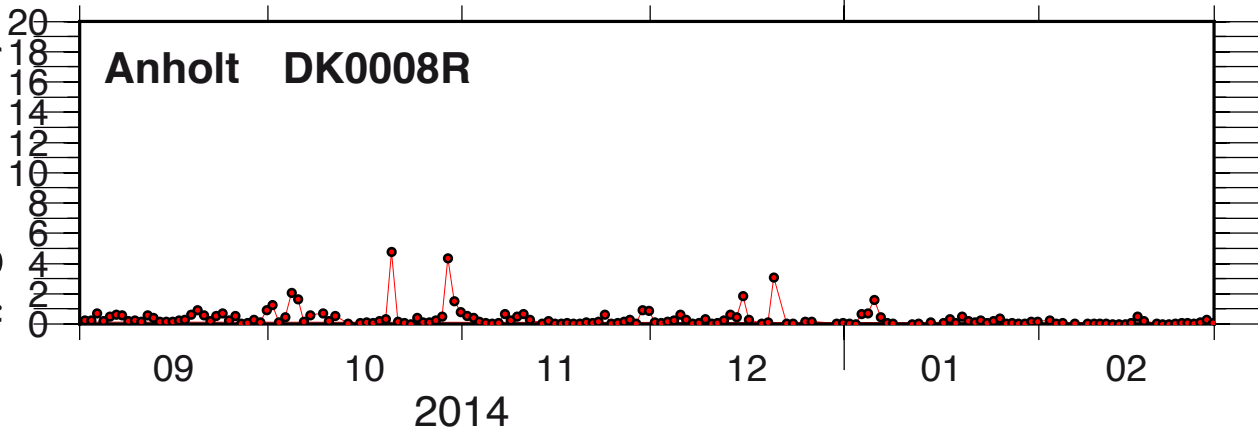

SO<sub>4</sub>-- (corr) mass conc

( $\mu\text{g S m}^{-3}$ )

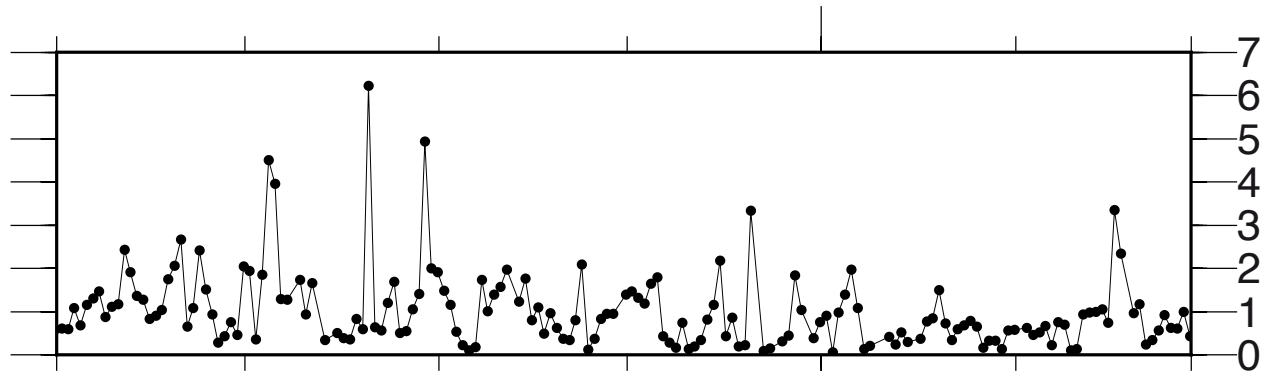

Supplement: Supplementary file 18 [file acp-19-14253-2019-supplement.zip]

SO<sub>2</sub> mass conc.

( $\mu\text{g S m}^{-3}$ )

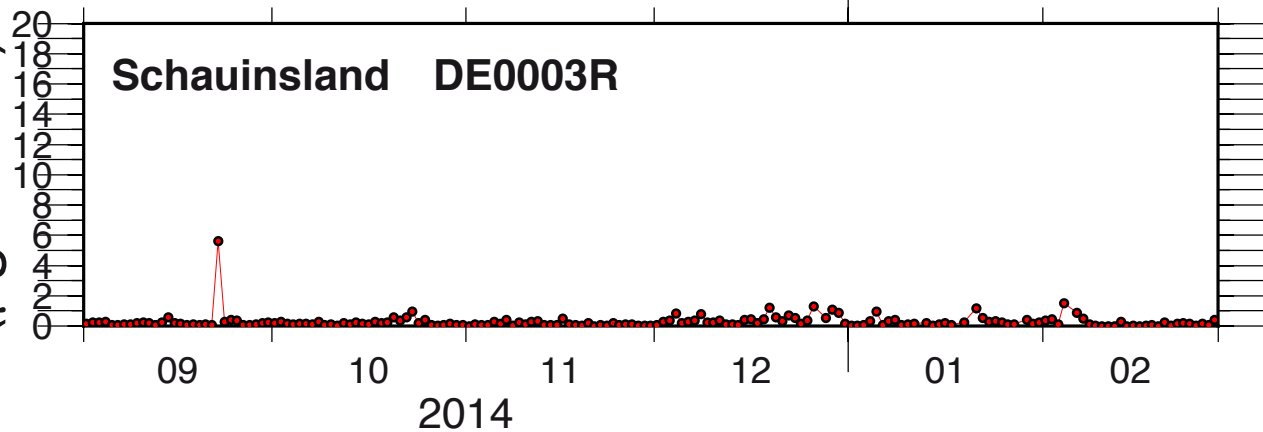

EMEP

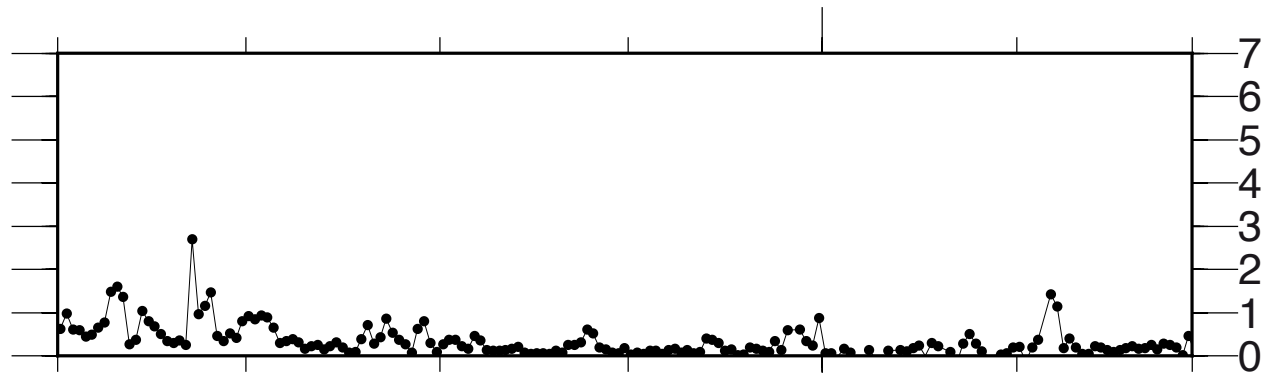

SO<sub>4</sub>-- (corr) mass conc  
( $\mu\text{g S m}^{-3}$ )

Supplement: Supplementary file 19 [file acp-19-14253-2019-supplement.zip]

# EMEP

SO<sub>2</sub> mass conc.  
( $\mu\text{g S m}^{-3}$ )

20  
18  
16  
14  
12  
10  
8  
6  
4  
2  
0

**Danki RU0018R**

09

10

11

12

01

02

2014

SO<sub>4</sub> mass conc  
( $\mu\text{g S m}^{-3}$ )

7  
6  
5  
4  
3  
2  
1  
0

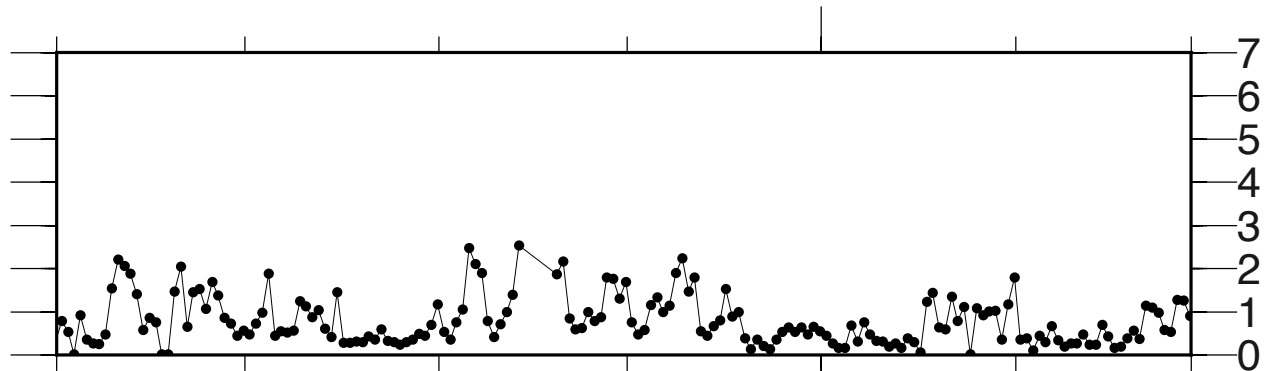

Supplement: Supplementary file 20 [file acp-19-14253-2019-supplement.zip]

# EMEP

SO<sub>2</sub> mass conc.

( $\mu\text{g S m}^{-3}$ )

20  
18  
16  
14  
12  
10  
8  
6  
4  
2  
0

BirkenesII NO0002R

2014

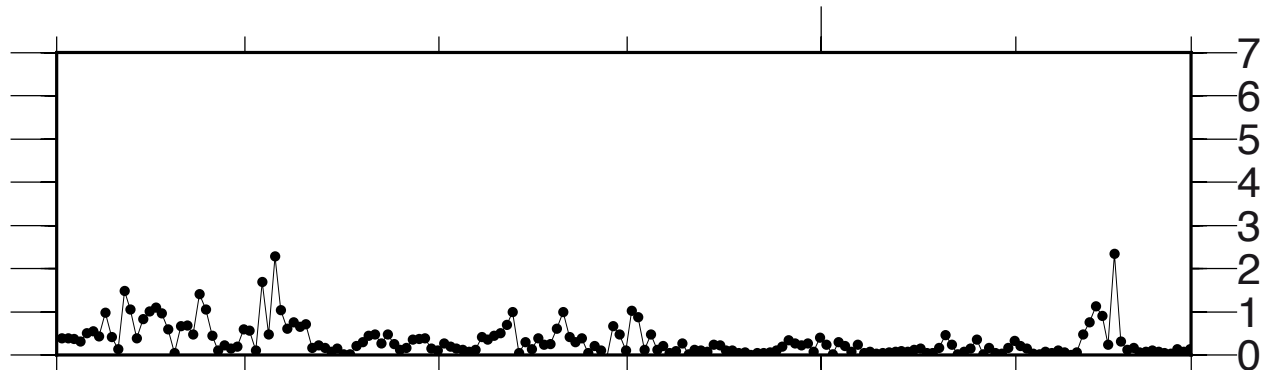

SO<sub>4</sub>-- (corr) mass conc  
( $\mu\text{g S m}^{-3}$ )

7  
6  
5  
4  
3  
2  
1  
0

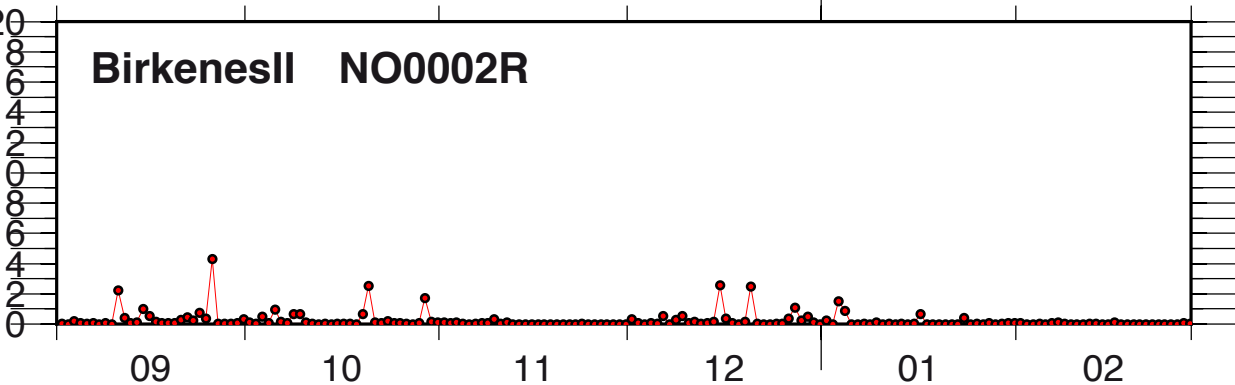

Supplement: Supplementary file 21 [file acp-19-14253-2019-supplement.zip]

# EMEP

SO<sub>2</sub> mass conc.

( $\mu\text{g S m}^{-3}$ )

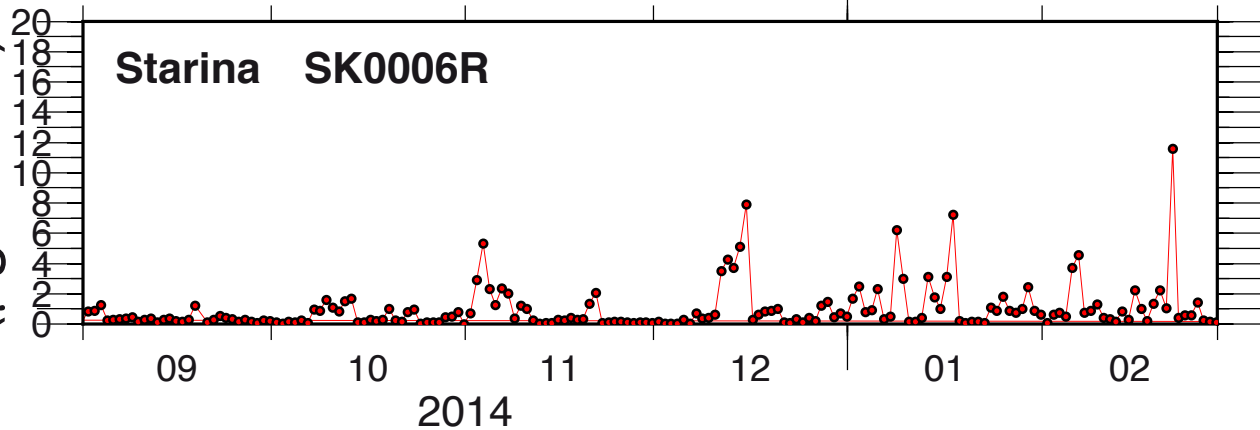

SO<sub>4</sub>-- (corr) mass conc  
( $\mu\text{g S m}^{-3}$ )

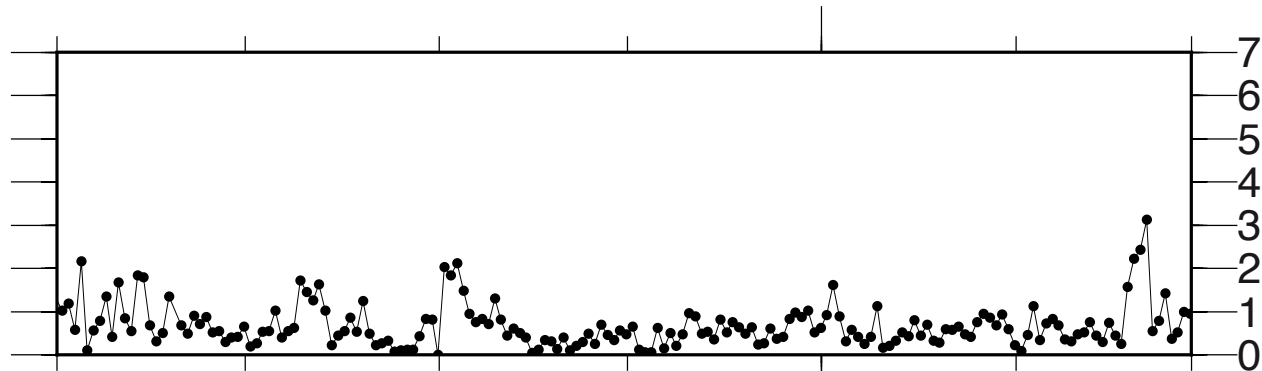

Supplement: Supplementary file 22 [file acp-19-14253-2019-supplement.zip]

# EMEP

SO<sub>2</sub> mass conc.

( $\mu\text{g S m}^{-3}$ )

20  
18  
16  
14  
12  
10  
8  
6  
4  
2  
0

Aspvreten SE0012R

09

10

11

12

01

02

2014

SO<sub>4</sub>-- (corr) mass conc  
( $\mu\text{g S m}^{-3}$ )

7  
6  
5  
4  
3  
2  
1  
0

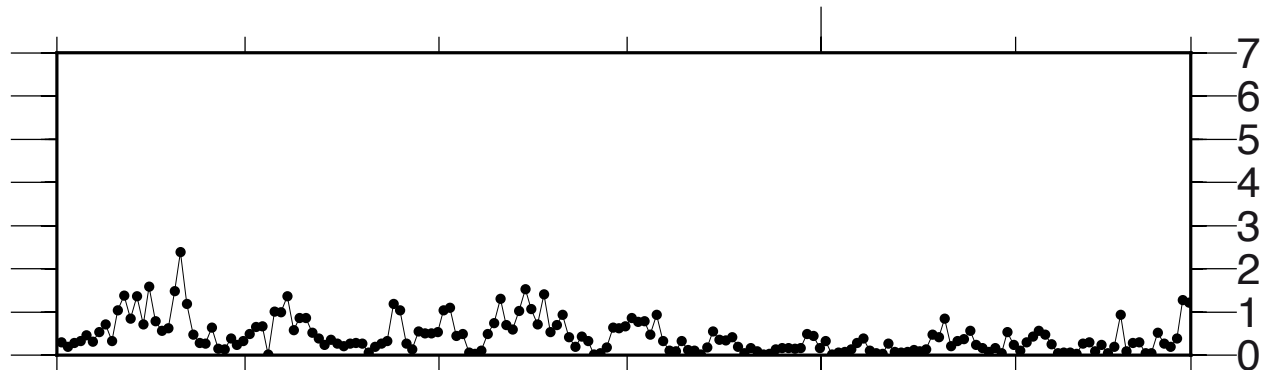

Supplement: Supplementary file 23 [file acp-19-14253-2019-supplement.zip]

# EMEP

SO<sub>2</sub> mass conc.

( $\mu\text{g S m}^{-3}$ )

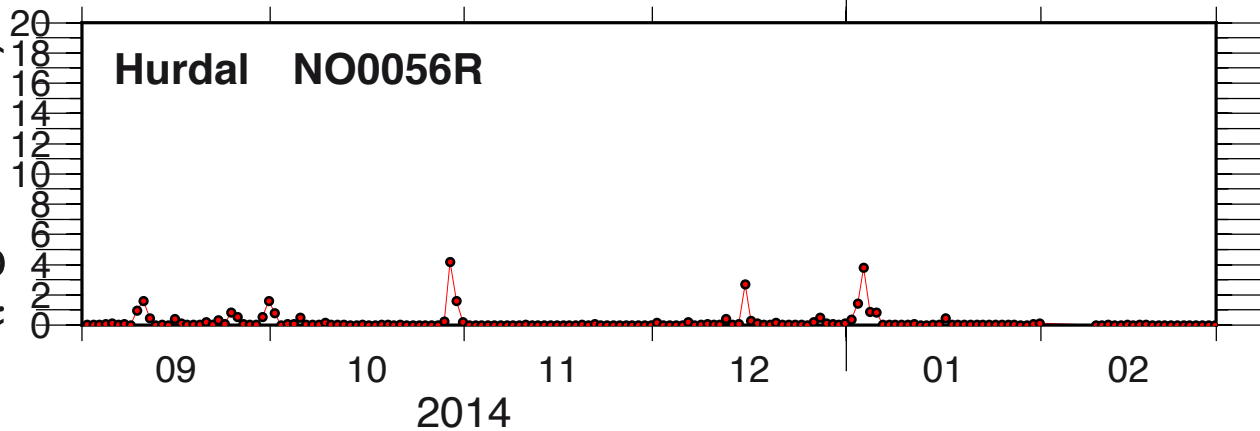

SO<sub>4</sub>-- (corr) mass conc  
( $\mu\text{g S m}^{-3}$ )

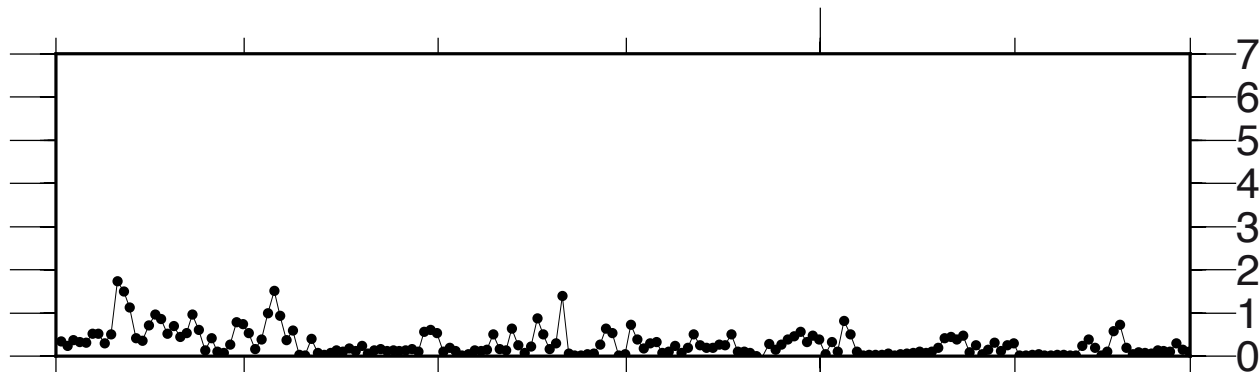

Supplement: Supplementary file 24 [file acp-19-14253-2019-supplement.zip]

SO<sub>2</sub> mass conc.

( $\mu\text{g S m}^{-3}$ )

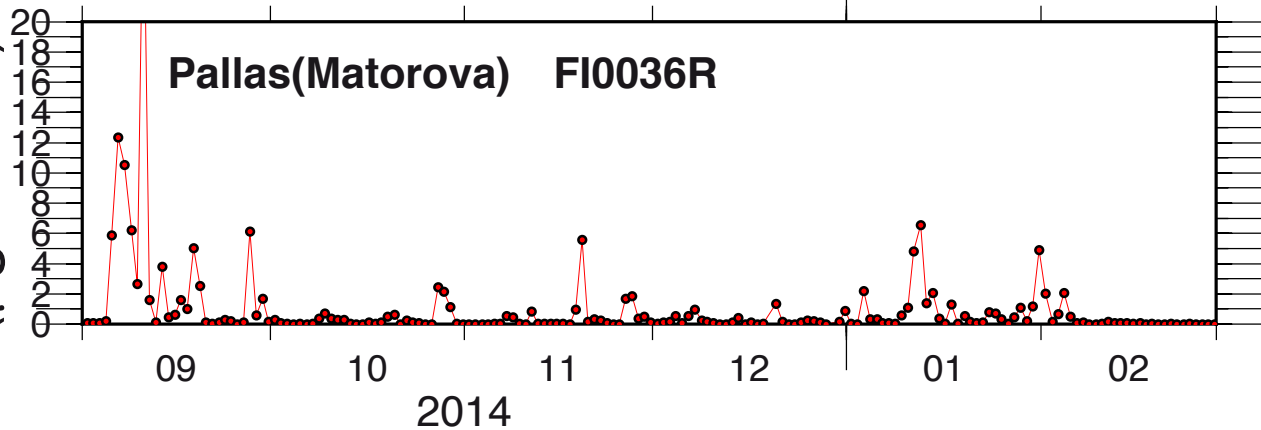

EMEP

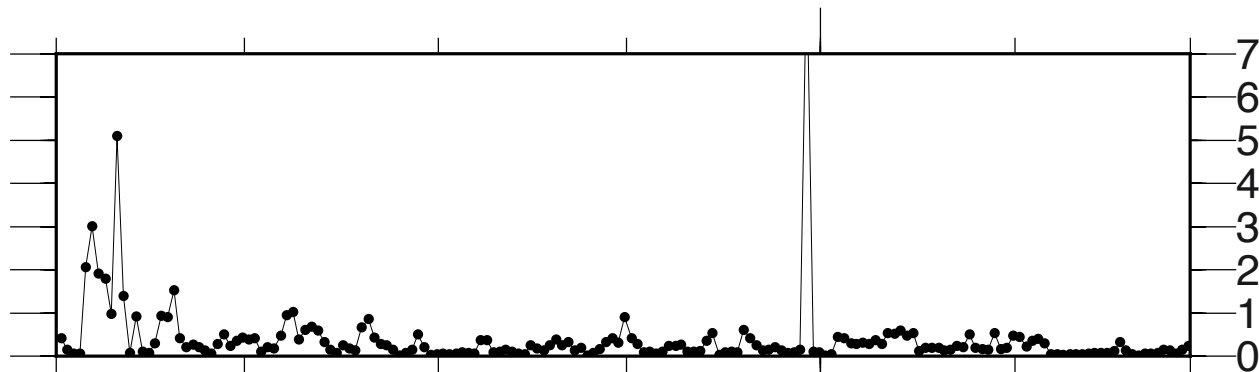

SO<sub>4</sub>-- (corr) mass conc  
( $\mu\text{g S m}^{-3}$ )

Supplement: Supplementary file 25 [file acp-19-14253-2019-supplement.zip]

# EMEP

SO<sub>2</sub> mass conc.

( $\mu\text{g S m}^{-3}$ )

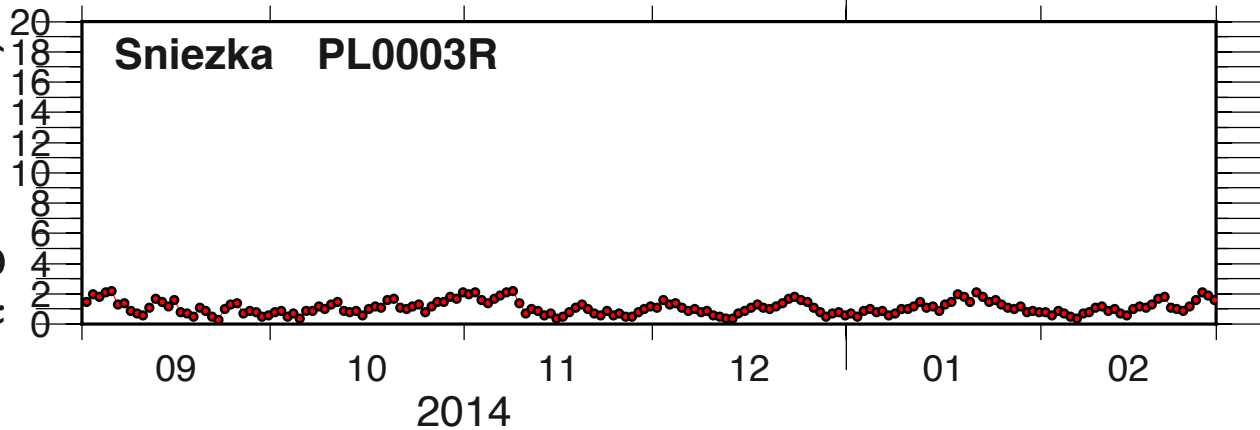

SO<sub>4</sub>-- (corr) mass conc  
( $\mu\text{g S m}^{-3}$ )

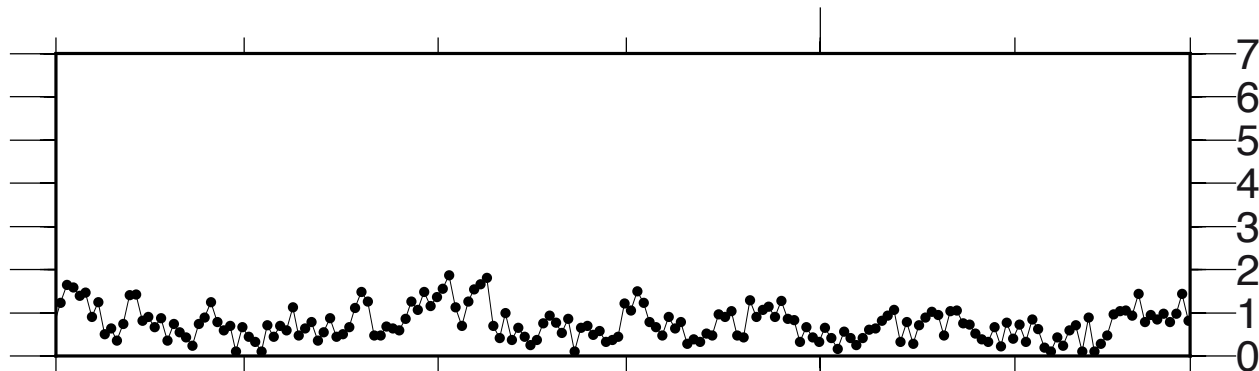

Supplement: Supplementary file 26 [file acp-19-14253-2019-supplement.zip]

# EMEP

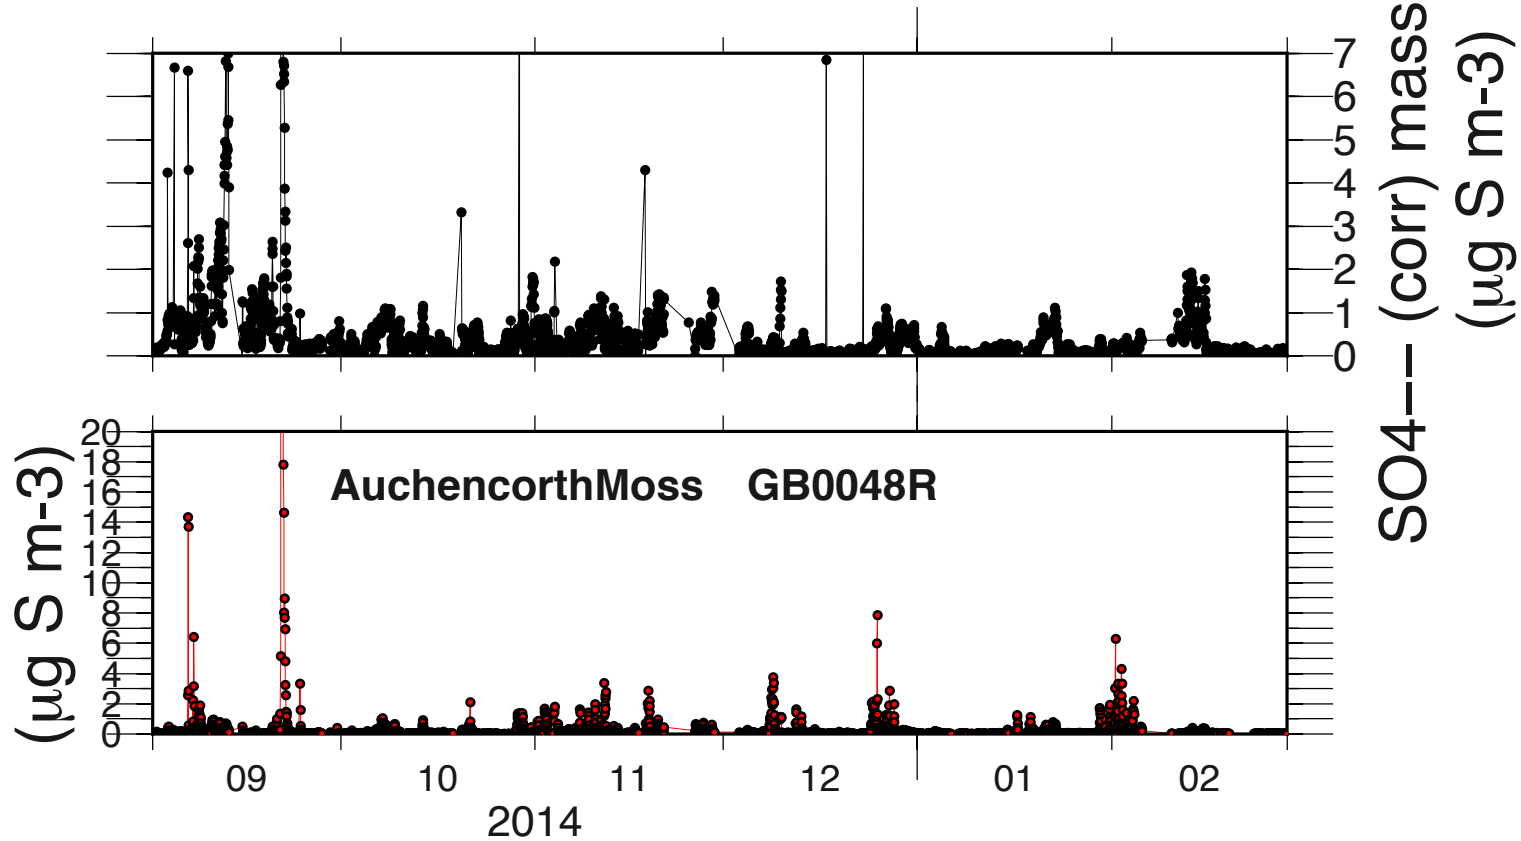

Supplement: Supplementary file 27 [file acp-19-14253-2019-supplement.zip]

# EMEP

SO<sub>2</sub> mass conc.

( $\mu\text{g S m}^{-3}$ )

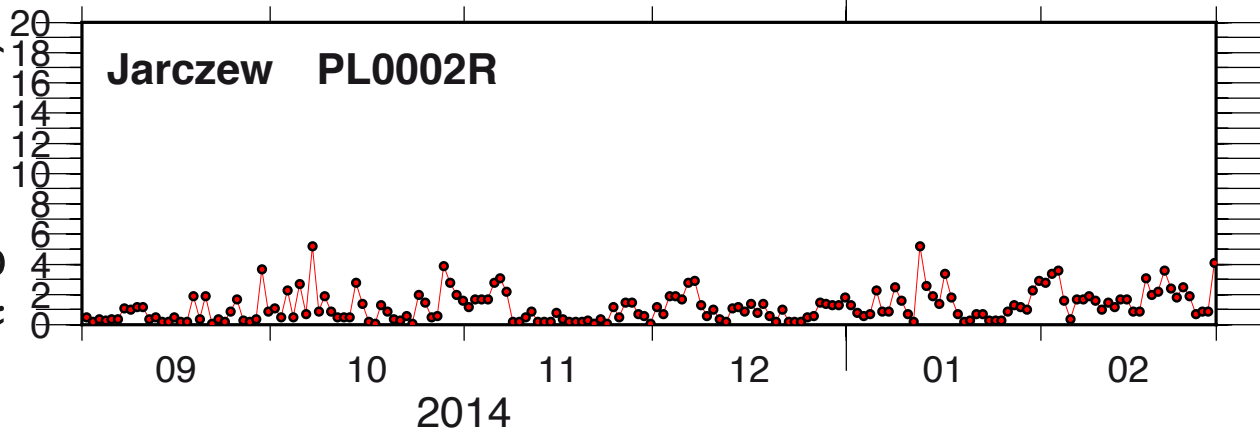

SO<sub>4</sub>-- (corr) mass conc  
( $\mu\text{g S m}^{-3}$ )

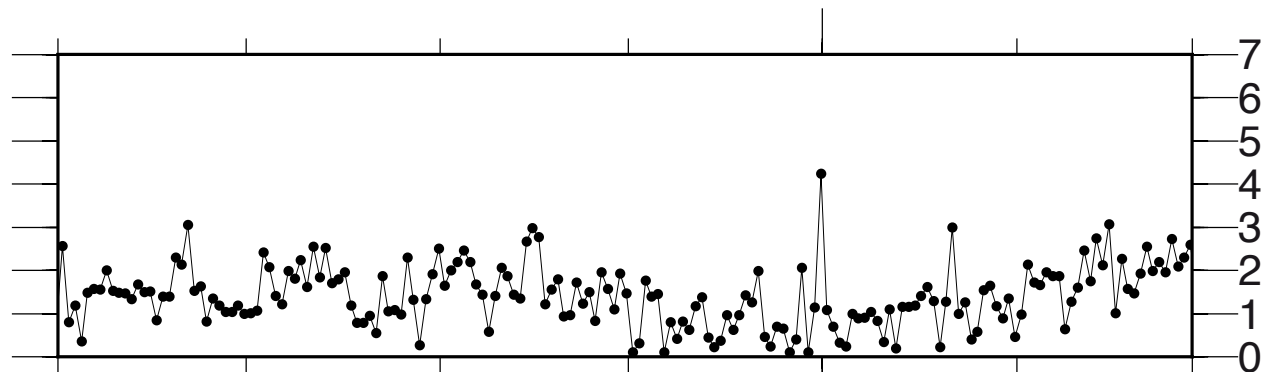

Supplement: Supplementary file 28 [file acp-19-14253-2019-supplement.zip]
